# Supplementary material
Source: PubMed Central journal article supplement (PMC3755476)
Supplement: NIHMS475602-supplement-01.pdf [file NIHMS475602-supplement-01.pdf]

## Supplementary Material

### Calculation of percent time UFP concentration was above threshold

We sorted all UFP sampling data points in a decreasing sequence and chose a threshold UFP concentration,  $C_i$ , as a benchmark concentration to subgroup the UFP data points. The cumulative data point,  $N_i$ , is the number of all the UFP concentrations above the  $C_i$ , threshold. We then evaluated the cumulative fraction of data points  $AN_i$  as:

$$AN_i = \frac{N_i}{N} \quad (1)$$

$N$  is total number of UFP 5-second sampling data points for either residential neighborhoods or major streets.

The cumulative UFP count,  $P_i$ , is proportional to the sum of all the UFP concentrations above  $C_i$ .

$$P_i = \sum C_{UFP} \quad \text{for } C_{UFP} > C_i \quad (3)$$

$$P_{total} = \sum C_{UFP} \quad \text{for all UFP concentrations} \quad (4)$$

$$AP_i = \frac{P_i}{P_{total}} \quad (5)$$

Here,  $P_{total}$  is the sum of all the ultrafine particles measured in residential area or major surface streets.  $P_i$  is the sum of all the ultrafine particles for UFP concentrations above the selected threshold.  $AP_i$  is cumulative fraction of UFPs contributed from UFP concentrations above  $C_i$  threshold.  $const$  is a constant number determined by the FMPS sampling flow rate times 5 seconds.
